# Supplementary material for: Association between Pre-Treatment Biological Indicators and Compliance to Neoadjuvant/Perioperative Chemotherapy in Operable Gastric Cancer
Source: MDPI journal article supplement (doi:10.3390/nu15163604), 2023-08-17
Supplement: s1 [file s1]

## SUPPLEMENTARY MATERIALS

**Table S1.** Univariate analysis between different indicators and compliance according to completed vs. not completed treatment in terms of planned/done cycles.

| Variable                            | No cycle completed<br>N=44 (%) | All completed cycles<br>N=40 (%) | Overall<br>N=84 (%) | <i>p</i> -value |
|-------------------------------------|--------------------------------|----------------------------------|---------------------|-----------------|
| <b>Median age in years (range)</b>  | 70.0 (22.8-80.2)               | 65.0 (48.6-75.7)                 | 67.2 (22.8-80.3)    | -               |
| <b>Age at start therapy (years)</b> |                                |                                  |                     |                 |
| ≤65                                 | 15 (34.1)                      | 19 (47.5)                        | 34 (40.5)           | 0.211           |
| >65                                 | 29 (65.9)                      | 21 (52.5)                        | 50 (59.5)           |                 |
| <b>Gender</b>                       |                                |                                  |                     |                 |
| Male                                | 25 (56.8)                      | 30 (75.0)                        | 55 (65.5)           | 0.080           |
| Female                              | 19 (43.2)                      | 10 (25.0)                        | 29 (34.5)           |                 |
| <b>Race</b>                         |                                |                                  |                     |                 |
| Caucasian/white                     | 44 (100.0)                     | 39 (97.5)                        | 83 (98.8)           | -               |
| Asiatic                             | 0 (0.0)                        | 1 (2.5)                          | 1 (1.2)             |                 |
| <b>ECOG (performance status)</b>    |                                |                                  |                     |                 |
| 0                                   | 42 (97.7)                      | 34 (89.5)                        | 76 (93.8)           | 0.181           |
| 1                                   | 1 (2.3)                        | 4 (10.5)                         | 5 (6.1)             |                 |
| Unknown                             | 1                              | 2                                | 3                   |                 |
| <b>Tumor localization</b>           |                                |                                  |                     |                 |
| Fundus                              | 6 (13.6)                       | 5 (12.5)                         | 11 (13.1)           | 0.660           |
| Corpus                              | 14 (31.8)                      | 10 (25.0)                        | 24 (28.6)           |                 |
| Antrum/Pylorus                      | 10 (22.7)                      | 14 (35.0)                        | 24 (28.6)           |                 |
| Other                               | 14 (31.8)                      | 11 (27.5)                        | 25 (29.8)           |                 |
| <b>Tumor differentiation</b>        |                                |                                  |                     |                 |

|                                  |         |           |           |           |       |
|----------------------------------|---------|-----------|-----------|-----------|-------|
| G1                               |         | 2 (6.1)   | 1 (3.5)   | 3 (4.8)   | 1.000 |
| G2                               |         | 11 (33.3) | 11 (37.9) | 22 (35.5) |       |
| G3                               |         | 18 (54.5) | 16 (55.1) | 34 (54.8) |       |
| G4                               |         | 2 (6.1)   | 1 (3.5)   | 3 (4.9)   |       |
| Unknown                          | Unknown | 11        | 11        | 22        |       |
| cT                               |         |           |           |           |       |
| T2                               |         | 7 (15.9)  | 4 (10.0)  | 11 (13.1) | 0.777 |
| T3                               |         | 26 (59.1) | 25 (62.5) | 51 (60.7) |       |
| T4                               |         | 11 (25.0) | 11 (27.2) | 22 (26.2) |       |
| cN                               |         |           |           |           |       |
| N0                               |         | 8 (18.2)  | 7 (17.5)  | 15 (17.9) | 0.935 |
| N+                               |         | 36 (81.8) | 33 (82.5) | 69 (82.1) |       |
| Lauren histotype                 |         |           |           |           |       |
| Diffuse                          |         | 7 (25.0)  | 5 (17.9)  | 12 (21.4) | 0.915 |
| Intestinal                       |         | 18 (64.3) | 20 (71.4) | 38 (67.9) |       |
| Mixed                            |         | 3 (10.7)  | 3 (10.7)  | 6 (10.7)  |       |
| Unknown                          |         | 16        | 12        | 28        |       |
| Pre NLR                          |         |           |           |           |       |
| NLR<1.60                         |         | 5 (11.4)  | 4 (10.0)  | 9 (10.7)  | 1.000 |
| NLR≥1.60                         |         | 39 (88.6) | 36 (90.0) | 75 (89.3) |       |
| Before 2 <sup>nd</sup> cycle NLR |         |           |           |           |       |
| NLR<3.05                         |         | 31 (73.8) | 35 (87.5) | 66 (80.5) | 0.118 |
| NLR≥3.05                         |         | 11 (26.2) | 5 (12.5)  | 16 (19.5) |       |
| Unknown                          |         | 2         | 0         | 2         |       |
| Variation of NLR                 |         |           |           |           |       |
| Both lower than cut off          |         | 4 (9.5)   | 4 (10.0)  | 8 (9.8)   | 0.409 |
| From lower to higher             |         | 1 (2.4)   | 0 (0.0)   | 1 (1.2)   |       |
| From higher to lower             |         | 27 (64.3) | 31 (77.5) | 58 (70.7) |       |
| Both higher than cut off         |         | 10 (23.8) | 5 (12.5)  | 15 (18.3) |       |

|                                        |           |           |           |       |
|----------------------------------------|-----------|-----------|-----------|-------|
| Unknown                                | 2         | 0         | 2         |       |
| <b>Pre MLR</b>                         |           |           |           |       |
| MLR <0.5                               | 40 (90.9) | 38 (95.0) | 78 (92.9) | 0.678 |
| MLR ≥0.5                               | 4 (9.1)   | 2 (5.0)   | 6 (7.1)   |       |
| <b>Before 2<sup>nd</sup> cycle MLR</b> |           |           |           |       |
| MLR <0.44                              | 27 (65.9) | 20 (50.0) | 47 (58.0) | 0.148 |
| MLR ≥0.44                              | 14 (34.1) | 20 (50.0) | 34 (42.0) |       |
| Unknown                                | 3         | 0         | 3         |       |
| <b>Variation of MLR</b>                |           |           |           |       |
| Both lower than cut off                | 9 (22.0)  | 6 (15.0)  | 15 (18.5) | 0.239 |
| From lower to higher                   | 3 (7.3)   | 1 (2.5)   | 4 (4.9)   |       |
| From higher to lower                   | 18 (43.9) | 14 (35.0) | 32 (39.5) |       |
| Both higher than cut off               | 11 (26.8) | 19 (47.5) | 30 (37.1) |       |
| Unknown                                | 3         | 0         | 3         |       |
| <b>Pre LMR</b>                         |           |           |           |       |
| LMR <2.6                               | 16 (36.4) | 9 (22.5)  | 25 (29.8) | 0.165 |
| LMR ≥2.6                               | 28 (63.6) | 31 (77.5) | 59 (70.2) |       |
| <b>Before 2<sup>nd</sup> Cycle LMR</b> |           |           |           |       |
| LMR <2.25                              | 13 (31.7) | 20 (50.0) | 33 (40.7) | 0.094 |
| LMR ≥2.25                              | 28 (68.3) | 20 (50.0) | 48 (59.3) |       |
| Unknown                                | 3         | 0         | 3         |       |
| <b>Variation of LMR</b>                |           |           |           |       |
| Both lower than cut off                | 8 (19.5)  | 9 (22.5)  | 17 (21.0) | 0.025 |
| From lower to higher                   | 7 (17.1)  | 0 (0.0)   | 7 (8.6)   |       |
| From higher to lower                   | 5 (12.2)  | 11 (27.5) | 16 (19.8) |       |
| Both higher than cut off               | 21 (51.2) | 20 (50.0) | 41 (50.6) |       |
| Unknown                                | 3         | 0         | 3         |       |
| <b>Pre LWR</b>                         |           |           |           |       |
| LWR<0.22                               | 15 (34.1) | 9 (22.5)  | 24 (28.6) | 0.240 |
| LWR≥0.22                               | 29 (65.9) | 31 (77.5) | 60 (71.4) |       |

**Before 2<sup>nd</sup> cycle LWR**

|          |           |           |           |       |
|----------|-----------|-----------|-----------|-------|
| LWR<0.22 | 11 (26.2) | 7 (17.5)  | 18 (22.0) | 0.342 |
| LWR≥0.22 | 31 (73.8) | 33 (82.5) | 64 (78.0) |       |
| Unknown  | 2         | 0         | 2         |       |

**Variation of LWR**

|                          |           |           |           |       |
|--------------------------|-----------|-----------|-----------|-------|
| Both lower than cut off  | 7 (16.7)  | 4 (10.0)  | 11 (13.4) | 0.670 |
| From lower to higher     | 7 (16.7)  | 5 (12.5)  | 12 (14.6) |       |
| From higher to lower     | 4 (9.5)   | 3 (7.5)   | 7 (8.6)   |       |
| Both higher than cut off | 24 (57.1) | 28 (70.0) | 52 (63.4) |       |
| Unknown                  | 2         | 0         | 2         |       |

**Pre SII**

|         |           |           |           |       |
|---------|-----------|-----------|-----------|-------|
| SII<490 | 10 (22.7) | 19 (47.5) | 29 (34.5) | 0.017 |
| SII≥490 | 34 (77.3) | 21 (52.5) | 55 (65.5) |       |

**Before 2<sup>nd</sup> cycle SII**

|         |           |           |           |       |
|---------|-----------|-----------|-----------|-------|
| SII<448 | 18 (42.9) | 25 (62.5) | 43 (52.4) | 0.075 |
| SII≥448 | 24 (57.1) | 15 (37.5) | 39 (47.6) |       |
| Unknown | 2         | 0         | 2         |       |

**Variation of SII**

|                          |           |           |           |       |
|--------------------------|-----------|-----------|-----------|-------|
| Both lower than cut off  | 8 (19.1)  | 13 (32.5) | 21 (25.6) | 0.032 |
| From lower to higher     | 2 (4.7)   | 6 (15.0)  | 8 (9.8)   |       |
| From higher to lower     | 10 (23.8) | 12 (30.0) | 22 (26.8) |       |
| Both higher than cut off | 22 (52.4) | 9 (22.5)  | 31 (37.8) |       |
| Unknown                  | 2         | 0         | 2         |       |

**Pre SIRI**

|           |           |           |           |       |
|-----------|-----------|-----------|-----------|-------|
| SIRI<1.05 | 18 (40.9) | 11 (27.5) | 29 (34.5) | 0.197 |
| SIRI≥1.05 | 26 (59.1) | 29 (72.5) | 55 (65.5) |       |

**Before 2<sup>nd</sup> cycle SIRI**

|           |           |           |           |       |
|-----------|-----------|-----------|-----------|-------|
| SIRI<0.78 | 16 (39.0) | 10 (25.0) | 26 (32.1) | 0.176 |
| SIRI≥0.78 | 25 (61.0) | 30 (75.0) | 55 (67.9) |       |
| Unknown   | 3         | 0         | 3         |       |

|                                   |           |           |           |       |
|-----------------------------------|-----------|-----------|-----------|-------|
| Variation of SIRI                 |           |           |           |       |
| Both lower than cut off           | 11 (26.8) | 6 (15.0)  | 17 (21.0) | 0.552 |
| From lower to higher              | 5 (12.2)  | 5 (12.5)  | 10 (12.4) |       |
| From higher to lower              | 5 (12.2)  | 4 (10.0)  | 9 (11.1)  |       |
| Both higher than cut off          | 20 (48.8) | 25 (62.5) | 45 (55.5) |       |
| Unknown                           | 3         | 0         | 3         |       |
| Pre dNLR                          |           |           |           |       |
| dNLR<1.76                         | 28 (63.6) | 23 (57.5) | 51 (60.7) | 0.565 |
| dNLR≥1.76                         | 16 (36.4) | 17 (42.5) | 33 (39.3) |       |
| Before 2 <sup>nd</sup> cycle dNLR |           |           |           |       |
| dNLR<1.75                         | 30 (70.0) | 36 (90.0) | 66 (79.5) | 0.030 |
| dNLR≥1.75                         | 13 (30.2) | 4 (10.0)  | 17 (20.5) |       |
| Unknown                           | 1         | 0         | 1         |       |
| Variation of dNLR                 |           |           |           |       |
| Both lower than cut off           | 23 (53.5) | 23 (57.5) | 46 (55.4) | 0.045 |
| From lower to higher              | 5 (11.6)  | 0 (0.0)   | 5 (6.0)   |       |
| From higher to lower              | 7 (16.3)  | 13 (32.5) | 20 (24.1) |       |
| Both higher than cut off          | 8 (18.6)  | 4 (10.0)  | 12 (14.5) |       |
| Pre PLR                           |           |           |           |       |
| PLR<152.0                         | 15 (34.1) | 24 (60.0) | 39 (46.4) | 0.017 |
| PLR≥152.0                         | 29 (65.9) | 16 (40.0) | 45 (53.6) |       |
| Before 2 <sup>nd</sup> cycle PLR  |           |           |           |       |
| PLR<131.0                         | 9 (21.4)  | 20 (50.0) | 29 (35.4) | 0.007 |
| PLR≥131.0                         | 33 (78.6) | 20 (50.0) | 53 (64.6) |       |
| Unknown                           | 2         | 0         | 2         |       |
| Variation of PLR                  |           |           |           |       |
| Both lower than cut off           | 6 (14.3)  | 16 (40.0) | 22 (26.8) | 0.034 |
| From lower to higher              | 9 (21.4)  | 8 (20.0)  | 17 (20.7) |       |
| From higher to lower              | 3 (7.1)   | 4 (10.0)  | 7 (8.5)   |       |
| Both higher than cut off          | 24 (57.1) | 12 (30.0) | 36 (44.0) |       |

|                           |           |           |           |       |  |
|---------------------------|-----------|-----------|-----------|-------|--|
| <b>Pre SMI*</b>           |           |           |           |       |  |
| Sarcopenia                | 20 (51.3) | 18 (50.0) | 38 (50.7) | 0.912 |  |
| No sarcopenia             | 19 (48.7) | 18 (50.0) | 37 (49.3) |       |  |
| Unknown                   | 5         | 4         | 9         |       |  |
| <b>Post SMI*</b>          |           |           |           |       |  |
| Sarcopenia                | 22 (56.4) | 23 (63.9) | 45 (60.0) | 0.509 |  |
| No sarcopenia             | 17 (43.6) | 13 (36.1) | 30 (40.0) |       |  |
| Unknown                   | 5         | 4         | 9         |       |  |
| <b>Pre VATI (cm/m²)</b>   |           |           |           |       |  |
| <46                       | 22 (52.4) | 18 (47.4) | 40 (50.0) | 0.654 |  |
| ≥46                       | 20 (47.6) | 20 (52.6) | 40 (50.0) |       |  |
| Unknown                   | 2         | 2         | 4         |       |  |
| <b>Post VATI (cm/m²)</b>  |           |           |           |       |  |
| <51                       | 19 (47.5) | 20 (52.6) | 39 (50.0) | 0.651 |  |
| ≥51                       | 21 (52.5) | 18 (47.4) | 39 (50.0) |       |  |
| Unknown                   | 4         | 2         | 6         |       |  |
| <b>Pre SATI (cm/m²)</b>   |           |           |           |       |  |
| <50.8                     | 22 (52.4) | 18 (47.4) | 40 (50.0) | 0.654 |  |
| ≥50.8                     | 20 (47.6) | 20 (52.6) | 40 (50.0) |       |  |
| Unknown                   | 2         | 2         | 4         |       |  |
| <b>Post SATI (cm/m²)</b>  |           |           |           |       |  |
| <46.0                     | 17 (42.5) | 22 (57.9) | 39 (50.0) | 0.174 |  |
| ≥46.0                     | 23 (57.5) | 16 (42.1) | 39 (50.0) |       |  |
| Unknown                   | 4         | 2         | 6         |       |  |
| <b>Pre IMATI (cm/m²)</b>  |           |           |           |       |  |
| <3.33                     | 17 (40.5) | 23 (60.5) | 40 (50.0) | 0.073 |  |
| ≥3.33                     | 25 (59.5) | 15 (39.5) | 40 (50.0) |       |  |
| Unknown                   | 2         | 2         | 4         |       |  |
| <b>Post IMATI (cm/m²)</b> |           |           |           |       |  |
| <3.40                     | 16 (40.0) | 23 (60.5) | 39 (50.0) | 0.070 |  |

|                                                                            |            |            |           |       |
|----------------------------------------------------------------------------|------------|------------|-----------|-------|
| ≥3.40                                                                      | 24 (60.0)  | 15 (39.5)  | 39 (50.0) |       |
| Unknown                                                                    | 4          | 2          | 6         |       |
| <b>Treatment</b>                                                           |            |            |           |       |
| CF/ FOLFOX4/6                                                              | 17 (38.6)  | 4 (10.0)   | 21 (25.0) |       |
| DOC                                                                        | 20 (45.4)  | 24 (60.0)  | 44 (52.4) | 0.016 |
| ECX/ECF/EOX                                                                | 2 (4.6)    | 6 (15.0)   | 8 (9.5)   |       |
| FLOT                                                                       | 5 (11.4)   | 6 (15.0)   | 11 (13.1) |       |
| <b>WBC count – pre therapy (cells/mm<sup>3</sup>)</b>                      |            |            |           |       |
| <4.000                                                                     | 0 (0.0)    | 1 (2.5)    | 1 (1.2)   | 0.476 |
| ≥4.000                                                                     | 44 (100.0) | 39 (97.5)  | 83 (98.8) |       |
| <b>WBC count – 2<sup>nd</sup> evaluation (cells/mm<sup>3</sup>)</b>        |            |            |           |       |
| <4.000                                                                     | 8 (18.6)   | 6 (15.0)   | 14 (16.9) | 0.661 |
| ≥4.000                                                                     | 35 (81.4)  | 34 (85.0)  | 69 (83.1) |       |
| Unknown                                                                    | 1          | 0          | 1         |       |
| <b>WBC variation from baseline to 2<sup>nd</sup></b>                       |            |            |           |       |
| Decrease                                                                   | 35 (81.4)  | 28 (70.0)  | 63 (75.9) | 0.305 |
| Increase                                                                   | 8 (18.6)   | 12 (30.0)  | 20 (24.1) |       |
| Unknown                                                                    | 1          | 0          | 1         |       |
| <b>Lymphocyte count – pre therapy (cells/mm<sup>3</sup>)</b>               |            |            |           |       |
| <1.000                                                                     | 2 (4.6)    | 0 (0.0)    | 2 (2.4)   | 0.495 |
| 1.000-4.000                                                                | 42 (95.4)  | 40 (100.0) | 82 (97.6) |       |
| <b>Lymphocyte count – 2<sup>nd</sup> evaluation (cells/mm<sup>3</sup>)</b> |            |            |           |       |
| <1.000                                                                     | 3 (7.1)    | 3 (7.5)    | 6 (7.3)   | 0.512 |
| 1.000-4.000                                                                | 39 (92.9)  | 35 (87.5)  | 74 (90.3) |       |
| >4.000                                                                     | 0 (0.0)    | 2 (5.0)    | 2 (2.4)   |       |
| Unknown                                                                    | 2          | 0          | 2         |       |
| <b>Lymphocyte variation from baseline to 2<sup>nd</sup></b>                |            |            |           |       |
| Decrease                                                                   | 29 (69.1)  | 22 (55.0)  | 51 (62.2) | 0.255 |
| Increase                                                                   | 13 (30.9)  | 18 (45.0)  | 31 (37.8) |       |
| Unknown                                                                    | 2          | 0          | 2         |       |

|                                                                        |           |           |           |       |
|------------------------------------------------------------------------|-----------|-----------|-----------|-------|
| Monocyte count – pre therapy (cells/mm <sup>3</sup> )                  |           |           |           |       |
| 200-1.000                                                              | 41 (93.2) | 37 (92.5) | 78 (92.9) | 1.000 |
| >1.000                                                                 | 3 (6.8)   | 3 (7.5)   | 6 (7.1)   |       |
| Monocyte count – 2 <sup>nd</sup> evaluation (cells/mm <sup>3</sup> )   |           |           |           |       |
| <200                                                                   | 0 (0.0)   | 1 (2.5)   | 1 (1.2)   | 0.071 |
| 200-1.000                                                              | 37 (88.1) | 28 (70.0) | 65 (79.3) |       |
| >1.000                                                                 | 5 (11.9)  | 11 (27.5) | 16 (19.5) |       |
| Unknown                                                                | 2         | 0         | 2         |       |
| Monocyte variation from baseline to 2 <sup>nd</sup>                    |           |           |           |       |
| Decrease                                                               | 18 (42.9) | 6 (15.0)  | 24 (29.3) | 0.006 |
| Increase                                                               | 24 (57.1) | 34 (85.0) | 58 (70.7) |       |
| Unknown                                                                | 2         | 0         | 2         |       |
| Platelets – pre therapy (cells/mm <sup>3</sup> )                       |           |           |           |       |
| <140.000                                                               | 1 (2.3)   | 0 (0.0)   | 1 (1.2)   | 1.000 |
| 140.000-400.000                                                        | 39 (88.6) | 37 (92.5) | 76 (90.5) |       |
| >400.000                                                               | 4 (9.1)   | 3 (7.5)   | 7 (8.3)   |       |
| Platelets – 2 <sup>nd</sup> evaluation (cells/mm <sup>3</sup> )        |           |           |           |       |
| <140.000                                                               | 5 (11.6)  | 1 (2.5)   | 6 (7.2)   | 0.201 |
| 140.000-400.000                                                        | 34 (79.1) | 36 (92.5) | 71 (85.5) |       |
| >400.000                                                               | 4 (9.3)   | 2 (5.0)   | 6 (7.3)   |       |
| Unknown                                                                | 1         | 0         | 1         |       |
| Platelet variation from baseline to 2 <sup>nd</sup>                    |           |           |           |       |
| Decrease                                                               | 25 (58.1) | 26 (65.0) | 51 (61.5) | 0.521 |
| Increase                                                               | 18 (41.9) | 14 (35.0) | 32 (38.5) |       |
| Unknown                                                                | 1         | 0         | 1         |       |
| Neutrophil count – pre therapy (cells/mm <sup>3</sup> )                |           |           |           |       |
| <2.000                                                                 | 0 (0.0)   | 1 (2.5)   | 1 (1.2)   | 0.504 |
| 2.000-8.000                                                            | 42 (95.5) | 36 (90.0) | 78 (92.9) |       |
| >8.000                                                                 | 2 (4.5)   | 3 (7.5)   | 5 (5.9)   |       |
| Neutrophil count - 2 <sup>nd</sup> evaluation (cells/mm <sup>3</sup> ) |           |           |           |       |



|                                                               |           |           |           |       |
|---------------------------------------------------------------|-----------|-----------|-----------|-------|
| <2.000                                                        | 14 (32.6) | 9 (22.5)  | 23 (27.7) | 0.225 |
| 2.000-8.000                                                   | 29 (67.4) | 29 (72.5) | 58 (69.9) |       |
| >8.000                                                        | 0 (0.0)   | 2 (5.0)   | 2 (2.4)   |       |
| Unknown                                                       | 1         | 0         | 1         |       |
| <b>Neutrophil variation from baseline to 2<sup>nd</sup></b>   |           |           |           |       |
| Decrease                                                      | 35 (81.4) | 31 (77.5) | 66 (79.5) | 0.787 |
| Increase                                                      | 8 (18.6)  | 9 (22.5)  | 21 (20.5) |       |
| Unknown                                                       | 1         | 0         | 1         |       |
| <b>Anemia – pre therapy</b>                                   |           |           |           |       |
| Hgb<11g/dL                                                    | 16 (36.4) | 10 (25.0) | 26 (31.0) | 0.261 |
| Hgb≥11g/dL                                                    | 28 (63.6) | 30 (75.0) | 58 (69.0) |       |
| <b>Anemia – 2<sup>nd</sup> evaluation</b>                     |           |           |           |       |
| Hgb<11 g/dL                                                   | 17 (39.5) | 13 (32.5) | 30 (36.1) | 0.505 |
| Hgb≥11 g/dL                                                   | 26 (60.5) | 27 (67.5) | 53 (63.9) |       |
| Unknown                                                       | 1         | 0         | 1         |       |
| <b>Hgb variation from baseline to 2<sup>nd</sup></b>          |           |           |           |       |
| Decrease                                                      | 34 (79.1) | 33 (82.5) | 67 (80.7) | 0.784 |
| Increase                                                      | 9 (20.4)  | 7 (17.5)  | 16 (19.3) |       |
| Unknown                                                       | 1         | 0         | 1         |       |
| <b>TBIL – pre therapy (mg/dL)</b>                             |           |           |           |       |
| <0.32                                                         | 18 (40.9) | 19 (47.5) | 37 (44.1) | 0.543 |
| ≥0.32                                                         | 26 (59.1) | 21 (52.5) | 47 (55.9) |       |
| <b>TBIL – 2<sup>nd</sup> evaluation (mg/dL)</b>               |           |           |           |       |
| <0.32                                                         | 19 (45.2) | 18 (46.2) | 37 (45.7) | 0.934 |
| ≥0.32                                                         | 23 (54.8) | 21 (53.8) | 44 (54.3) |       |
| Unknown                                                       | 2         | 1         | 3         |       |
| <b>TBIL variation from baseline to 2<sup>nd</sup> (mg/dL)</b> |           |           |           |       |
| From <0.32 to <0.32                                           | 12 (28.6) | 14 (35.9) | 26 (32.1) | 0.746 |
| From <0.32 to ≥0.32                                           | 4 (9.5)   | 5 (12.8)  | 9 (11.1)  |       |
| From ≥ 0.32 to <0.32                                          | 7 (16.7)  | 4 (10.3)  | 11 (13.6) |       |

|                                                                    |           |           |           |       |
|--------------------------------------------------------------------|-----------|-----------|-----------|-------|
| From $\geq 0.32$ to $\geq 0.32$                                    | 19 (45.2) | 16 (41.0) | 35 (43.2) |       |
| Unknown                                                            | 2         | 1         | 3         |       |
| <b>eGFR –pre therapy (ml/min/1.73 m<sup>2</sup>)</b>               |           |           |           |       |
| Higher than 90                                                     | 12 (27.3) | 17 (44.7) | 29 (35.4) |       |
| From 60 to 89                                                      | 28 (63.6) | 18 (47.4) | 46 (56.1) | 0.277 |
| From 30 to 59                                                      | 4 (9.1)   | 3 (7.9)   | 7 (8.5)   |       |
| Unknown                                                            | 0         | 2         | 2         |       |
| <b>eGFR –2<sup>nd</sup> evaluation (ml/min/1.73 m<sup>2</sup>)</b> |           |           |           |       |
| Higher than 90                                                     | 18 (43.9) | 22 (56.4) | 40 (50.0) |       |
| From 60 to 89                                                      | 19 (46.3) | 15 (38.5) | 34 (42.5) | 0.514 |
| From 30 to 59                                                      | 4 (9.8)   | 2 (5.1)   | 6 (7.5)   |       |
| Unknown                                                            | 3         | 1         | 4         |       |
| <b>eGFR variation from baseline to 2<sup>nd</sup></b>              |           |           |           |       |
| Decrease                                                           | 12 (29.3) | 17 (44.7) | 29 (36.7) |       |
| Increase                                                           | 29 (70.7) | 21 (55.3) | 50 (63.3) | 0.154 |
| Unknown                                                            | 3         | 2         | 5         |       |
| <b>BMI (kg/m<sup>2</sup>)</b>                                      |           |           |           |       |
| <20                                                                | 3 (6.8)   | 3 (7.5)   | 6 (7.2)   | 0.841 |
| 20.0-24.9                                                          | 15 (34.1) | 15 (37.5) | 30 (35.7) |       |
| 25.0-29.9                                                          | 20 (45.5) | 19 (47.5) | 39 (46.4) |       |
| $\geq 30$                                                          | 6 (13.6)  | 3 (7.5)   | 9 (10.7)  |       |

BMI; body mass index; HgB; hemoglobin; cN, clinical lymph nodes; cT, clinical tumor; dNLR, neutrophils/white blood cells-neutrophils; ECOG; Eastern Cooperative Oncology Group; eGFR, glomerular filtration rate; IMATI, intermuscular adipose tissue index; LMR, lymphocytes-to-monocytes ratio; LWR, lymphocytes-to-white blood cells ratio; MLR, monocytes-to-lymphocytes ratio; NLR, neutrophils-to-lymphocytes ratio; PLR, platelets-to-lymphocytes ratio; Post, after the last cycle of chemotherapy and then before surgery; Pre, before starting the first cycle of chemotherapy; SATI, subcutaneous adipose tissue index; SII, platelets×neutrophils/lymphocytes; SIRI, neutrophils×monocytes/lymphocytes; SMI, skeletal muscle index; TBIL, total bilirubin; VATI, visceral adipose tissue index; WBC, white blood cells.

\*Sarcopenia was searched on the definition by Martin *et al.* [21].

**Table S2.** Patient characteristics according to completed treatment (completed cycles vs. interruption by cause).

| Variable                           | All completed cycles<br>N=40 (%) | Non adherent patients |                               |                                    |                     | Overall<br>N=84 (%) |
|------------------------------------|----------------------------------|-----------------------|-------------------------------|------------------------------------|---------------------|---------------------|
|                                    |                                  | Toxicity<br>N=14 (%)  | Patient's decision<br>N=8 (%) | Investigator's decision<br>N=7 (%) | Other<br>N=15 (%)   |                     |
| <b>Median age in years (range)</b> | 65.0 (48.6-75.7)                 | 67.3<br>(22.8-80.2)   | 71.1<br>(49.4-80.2)           | 72.5<br>(60.7-79.7)                | 69.3<br>(56.1-79.6) | 67.2<br>(22.8-80.3) |
| <b>Age at start therapy</b>        |                                  |                       |                               |                                    |                     |                     |
| ≤65                                | 19 (47.5)                        | 6 (42.9)              | 2 (25.0)                      | 2 (28.6)                           | 5 (33.3)            | 34 (40.5)           |
| >65                                | 21 (52.5)                        | 8 (57.1)              | 6 (75.0)                      | 5 (71.4)                           | 10 (66.7)           | 50 (59.5)           |
| <b>Gender</b>                      |                                  |                       |                               |                                    |                     |                     |
| Male                               | 30 (75.0)                        | 10 (71.4)             | 3 (37.5)                      | 5 (71.4)                           | 7 (46.7)            | 55 (65.5)           |
| Female                             | 10 (25.0)                        | 4 (28.6)              | 5 (62.5)                      | 2 (28.6)                           | 8 (53.3)            | 29 (34.5)           |
| <b>Race</b>                        |                                  |                       |                               |                                    |                     |                     |
| Caucasian/white                    | 39 (97.5)                        | 14 (100.0)            | 8 (100.0)                     | 7 (100.0)                          | 15 (100.0)          | 83 (98.8)           |
| Asiatic                            | 1 (2.5)                          | 0 (0.0)               | 0 (0.0)                       | 0 (0.0)                            | 0 (0.0)             | 1 (1.2)             |
| <b>ECOG (performance status)</b>   |                                  |                       |                               |                                    |                     |                     |
| 0                                  | 34 (89.5)                        | 12 (92.3)             | 8 (100.0)                     | 7 (100.0)                          | 15 (100.0)          | 76 (93.8)           |
| 1                                  | 4 (10.5)                         | 1 (7.7)               | 0 (0.0)                       | 0 (0.0)                            | 0 (0.0)             | 5 (6.1)             |
| Unknown                            | 2                                | 1                     | 0                             | 0                                  | 0                   | 3                   |
| <b>Tumor localization</b>          |                                  |                       |                               |                                    |                     |                     |
| Fundus                             | 5 (12.5)                         | 3 (21.4)              | 1 (12.5)                      | 0 (0.0)                            | 2 (13.3)            | 11 (13.1)           |
| Corpus                             | 10 (25.0)                        | 4 (28.6)              | 3 (37.5)                      | 4 (57.1)                           | 3 (20.0)            | 24 (28.6)           |
| Antrum/Pilorus                     | 14 (35.0)                        | 4 (28.6)              | 2 (25.0)                      | 1 (14.3)                           | 3 (20.0)            | 24 (28.6)           |
| Other                              | 11 (27.5)                        | 3 (21.4)              | 2 (25.0)                      | 2 (28.6)                           | 7 (46.7)            | 25 (29.8)           |
| <b>Grading</b>                     |                                  |                       |                               |                                    |                     |                     |
| G1                                 | 1 (3.5)                          | 1 (10.0)              | 0 (0.0)                       | 1 (25.0)                           | 0 (0.0)             | 3 (4.8)             |
| G2                                 | 11 (37.9)                        | 3 (30.0)              | 2 (33.3)                      | 2 (50.0)                           | 4 (30.8)            | 22 (35.5)           |
| G3                                 | 16 (55.1)                        | 6 (60.0)              | 4 (66.7)                      | 1 (25.0)                           | 7 (53.8)            | 34 (54.8)           |

|                                        |           |           |           |          |           |           |
|----------------------------------------|-----------|-----------|-----------|----------|-----------|-----------|
| G4                                     | 1 (3.5)   | 0 (0.0)   | 0 (0.0)   | 0 (0.0)  | 2 (15.4)  | 3 (4.9)   |
| Unknown                                | 11        | 4         | 2         | 3        | 2         | 22        |
| <b>cT</b>                              |           |           |           |          |           |           |
| T2                                     | 4 (10.0)  | 4 (28.6)  | 0 (0.0)   | 2 (28.6) | 1 (6.7)   | 11 (13.1) |
| T3                                     | 25 (62.5) | 7 (50.0)  | 6 (75.0)  | 3 (42.8) | 10 (66.7) | 51 (60.7) |
| T4                                     | 11 (27.2) | 3 (21.4)  | 2 (25.0)  | 2 (28.6) | 4 (26.6)  | 22 (26.2) |
| <b>cN</b>                              |           |           |           |          |           |           |
| N0                                     | 7 (17.5)  | 3 (21.4)  | 2 (25.0)  | 1 (14.3) | 2 (13.3)  | 15 (17.9) |
| N+                                     | 33 (82.5) | 11 (78.6) | 6 (75.0)  | 6 (85.7) | 13 (86.7) | 69 (82.1) |
| <b>Lauren histotype</b>                |           |           |           |          |           |           |
| Diffuse                                | 5 (17.9)  | 2 (28.6)  | 1 (16.7)  | 1 (25.0) | 3 (27.3)  | 12 (21.4) |
| Intestinal                             | 20 (71.4) | 3 (42.8)  | 5 (83.3)  | 3 (75.0) | 7 (63.6)  | 38 (67.9) |
| Mixed                                  | 3 (10.7)  | 2 (28.6)  | 0 (0.0)   | 0 (0.0)  | 1 (9.1)   | 6 (10.7)  |
| Unknown                                | 12        | 7         | 2         | 3        | 4         | 28        |
| <b>Pre NLR</b>                         |           |           |           |          |           |           |
| NLR<1.60                               | 4 (10.0)  | 3 (21.4)  | 0 (0.0)   | 1 (14.3) | 1 (6.7)   | 9 (10.7)  |
| NLR≥1.60                               | 36 (90.0) | 11 (78.6) | 8 (100.0) | 6 (85.7) | 14 (93.3) | 75 (89.3) |
| <b>Before 2<sup>nd</sup> cycle NLR</b> |           |           |           |          |           |           |
| NLR <3.05                              | 35 (87.5) | 11 (84.6) | 3 (42.9)  | 5 (71.4) | 12 (80.0) | 66 (80.5) |
| NLR ≥3.05                              | 5 (12.5)  | 2 (15.4)  | 4 (57.1)  | 2 (28.6) | 3 (20.0)  | 16 (19.5) |
| Unknown                                | 0         | 1         | 1         | 0        | 0         | 2         |
| <b>Variation of NLR</b>                |           |           |           |          |           |           |
| Both lower than cut off                | 4 (10.0)  | 2 (15.4)  | 0 (0.0)   | 1 (14.3) | 1 (6.7)   | 8 (9.8)   |
| From lower to higher                   | 0 (0.0)   | 1 (7.7)   | 0 (0.0)   | 0 (0.0)  | 0 (0.0)   | 1 (1.2)   |
| From higher to lower                   | 31 (77.5) | 9 (69.2)  | 3 (42.9)  | 4 (57.1) | 11 (73.3) | 58 (70.7) |
| Both higher than cut off               | 5 (12.5)  | 1 (7.7)   | 4 (57.1)  | 2 (28.6) | 3 (20.0)  | 15 (18.3) |
| Unknown                                | 0         | 1         | 1         | 0        | 0         | 2         |
| <b>Pre MLR</b>                         |           |           |           |          |           |           |
| MLR <0.50                              | 38 (95.0) | 13 (92.9) | 8 (100.0) | 6 (85.7) | 13 (86.7) | 78 (92.9) |
| MLR ≥0.50                              | 2 (5.0)   | 1 (7.1)   | 0 (0.0)   | 1 (14.3) | 2 (13.3)  | 6 (7.1)   |

**Before 2<sup>nd</sup> cycle MLR**

|           |           |          |          |   |   |           |
|-----------|-----------|----------|----------|---|---|-----------|
| MLR <0.44 | 20 (50.0) | 8 (61.5) | 6 (85.7) | 4 | 9 | 47 (58.0) |
| MLR ≥0.44 | 20 (50.0) | 5 (38.5) | 1 (14.3) | 3 | 5 | 34 (42.0) |
| Unknown   | 0         | 1        | 1        | 0 | 1 | 3         |

**Variation of MLR**

|                          |           |          |          |          |          |           |
|--------------------------|-----------|----------|----------|----------|----------|-----------|
| Both lower than cut off  | 6 (15.0)  | 3 (23.1) | 2 (28.6) | 2 (28.6) | 2 (14.3) | 15 (18.5) |
| From lower to higher     | 1 (2.5)   | 2 (15.4) | 0 (0.0)  | 0 (0.0)  | 1 (7.1)  | 4 (4.9)   |
| From higher to lower     | 14 (35.0) | 5 (38.4) | 4 (57.1) | 2 (28.6) | 7 (50.0) | 32 (39.5) |
| Both higher than cut off | 19 (47.5) | 3 (23.1) | 1 (14.3) | 3 (42.8) | 4 (28.6) | 30 (37.1) |
| Unknown                  | 0         | 1        | 1        | 0        | 1        | 3         |

**Pre LMR**

|          |           |           |          |          |          |           |
|----------|-----------|-----------|----------|----------|----------|-----------|
| LMR <2.6 | 9 (22.5)  | 2 (14.3)  | 4 (50.0) | 4 (57.1) | 6 (40.0) | 25 (29.8) |
| LMR ≥2.6 | 31 (77.5) | 12 (85.7) | 4 (50.0) | 3 (42.9) | 9 (60.0) | 59 (70.2) |

**Before 2<sup>nd</sup> Cycle LMR**

|           |           |          |          |          |          |           |
|-----------|-----------|----------|----------|----------|----------|-----------|
| LMR <2.25 | 20 (50.0) | 4 (30.8) | 1 (14.3) | 3 (42.9) | 5 (35.7) | 33 (40.7) |
| LMR ≥2.25 | 20 (50.0) | 9 (69.2) | 6 (85.7) | 4 (57.1) | 9 (64.3) | 48 (59.3) |
| Unknown   | 0         | 1        | 1        | 0        | 1        | 3         |

**Variation of LMR**

|                          |           |          |          |          |          |           |
|--------------------------|-----------|----------|----------|----------|----------|-----------|
| Both lower than cut off  | 9 (22.5)  | 1 (7.7)  | 1 (14.3) | 3 (42.9) | 3 (21.4) | 17 (21.0) |
| From lower to higher     | 0 (0.0)   | 1 (7.7)  | 2 (28.6) | 1 (14.2) | 3 (21.4) | 7 (8.6)   |
| From higher to lower     | 11 (27.5) | 3 (23.1) | 0 (0.0)  | 0 (0.0)  | 2 (14.3) | 16 (19.8) |
| Both higher than cut off | 20 (50.0) | 8 (61.5) | 4 (57.1) | 3 (42.9) | 6 (42.9) | 41 (50.6) |
| Unknown                  | 0         | 1        | 1        | 0        | 1        | 3         |

**Pre LWR**

|           |           |           |          |          |          |           |
|-----------|-----------|-----------|----------|----------|----------|-----------|
| LWR <0.22 | 9 (22.5)  | 2 (14.3)  | 3 (37.5) | 3 (42.9) | 7 (46.7) | 24 (28.6) |
| LWR ≥0.22 | 31 (77.5) | 12 (85.7) | 5 (62.5) | 4 (57.1) | 8 (53.3) | 60 (71.4) |

**Before 2<sup>nd</sup> cycle LWR**

|           |           |           |          |          |           |           |
|-----------|-----------|-----------|----------|----------|-----------|-----------|
| LWR <0.22 | 7 (17.5)  | 2 (15.4)  | 4 (57.1) | 2 (28.6) | 3 (20.0)  | 18 (22.0) |
| LWR ≥0.22 | 33 (82.5) | 11 (84.6) | 3 (42.9) | 5 (71.4) | 12 (80.0) | 64 (78.0) |
| Unknown   | 0         | 1         | 1        | 0        | 0         | 2         |

**Variation of LWR**

|                          |           |           |          |          |          |           |
|--------------------------|-----------|-----------|----------|----------|----------|-----------|
| Both lower than cut off  | 4 (10.0)  | 1 (7.7)   | 2 (28.6) | 2 (28.6) | 2 (13.3) | 11 (13.4) |
| From lower to higher     | 5 (12.5)  | 1 (7.7)   | 0 (0.0)  | 1 (14.3) | 5 (33.3) | 12 (14.6) |
| From higher to lower     | 3 (7.5)   | 1 (7.7)   | 2 (28.6) | 0 (0.0)  | 1 (6.7)  | 7 (8.6)   |
| Both higher than cut off | 28 (70.0) | 10 (76.9) | 3 (42.8) | 4 (57.1) | 7 (46.7) | 52 (63.4) |
| Unknown                  | 0         | 1         | 1        | 0        | 0        | 2         |

**Pre SII**

|          |           |          |          |          |           |           |
|----------|-----------|----------|----------|----------|-----------|-----------|
| SII <490 | 19 (47.5) | 5 (35.7) | 1 (12.5) | 1 (14.3) | 3 (20.0)  | 29 (34.5) |
| SII ≥490 | 21 (52.5) | 9 (64.3) | 7 (87.5) | 6 (85.7) | 12 (80.0) | 55 (65.5) |

**Before 2<sup>nd</sup> cycle SII**

|          |           |          |          |          |          |           |
|----------|-----------|----------|----------|----------|----------|-----------|
| SII <448 | 25 (62.5) | 8 (61.5) | 1 (14.3) | 2 (28.6) | 7 (46.7) | 43 (52.4) |
| SII ≥448 | 15 (37.5) | 5 (38.5) | 6 (85.7) | 5 (71.4) | 8 (53.3) | 39 (47.6) |
| Unknown  | 0         | 1        | 1        | 0        | 0        | 2         |

**Variation of SII**

|                          |           |          |          |          |          |           |
|--------------------------|-----------|----------|----------|----------|----------|-----------|
| Both lower than cut off  | 13 (32.5) | 3 (23.0) | 1 (14.3) | 1 (14.3) | 3 (20.0) | 21 (25.6) |
| From lower to higher     | 6 (15.0)  | 2 (15.4) | 0 (0.0)  | 0 (0.0)  | 0 (0.0)  | 8 (9.8)   |
| From higher to lower     | 12 (30.0) | 5 (38.6) | 0 (0.0)  | 1 (14.3) | 4 (26.7) | 22 (26.8) |
| Both higher than cut off | 9 (22.5)  | 3 (23.0) | 6 (85.7) | 5 (71.4) | 8 (53.3) | 31 (37.8) |
| Unknown                  | 0         | 1        | 1        | 0        | 0        | 2         |

**Pre SIRI**

|            |           |          |          |          |          |           |
|------------|-----------|----------|----------|----------|----------|-----------|
| SIRI <1.05 | 11 (27.5) | 7 (50.0) | 3 (37.5) | 2 (28.6) | 6 (40.0) | 29 (34.5) |
| SIRI ≥1.05 | 29 (72.5) | 7 (50.0) | 5 (62.5) | 5 (71.4) | 9 (60.0) | 55 (65.5) |

**Before 2<sup>nd</sup> cycle SIRI**

|            |           |          |          |          |          |           |
|------------|-----------|----------|----------|----------|----------|-----------|
| SIRI <0.78 | 10 (25.0) | 6 (45.2) | 2 (28.6) | 2 (28.6) | 6 (42.9) | 26 (32.1) |
| SIRI ≥0.78 | 30 (75.0) | 7 (53.8) | 5 (71.4) | 5 (71.4) | 8 (57.1) | 55 (67.9) |
| Unknown    | 0         | 1        | 1        | 0        | 1        | 3         |

**Variation of SIRI**

|                         |          |          |          |          |          |           |
|-------------------------|----------|----------|----------|----------|----------|-----------|
| Both lower than cut off | 6 (15.0) | 4 (30.8) | 2 (28.6) | 2 (28.6) | 3 (21.4) | 17 (21.0) |
| From lower to higher    | 5 (12.5) | 2 (15.4) | 1 (14.3) | 0 (0.0)  | 2 (14.3) | 10 (12.4) |
| From higher to lower    | 4 (10.0) | 2 (15.4) | 0 (0.0)  | 0 (0.0)  | 3 (21.4) | 9 (11.1)  |

|                                         |           |           |           |          |           |           |
|-----------------------------------------|-----------|-----------|-----------|----------|-----------|-----------|
| Both higher than cut off                | 25 (62.5) | 5 (38.4)  | 4 (57.1)  | 5 (71.4) | 6 (42.9)  | 45 (55.5) |
| Unknown                                 | 0         | 1         | 1         | 0        | 1         | 3         |
| <b>Pre dNLR</b>                         |           |           |           |          |           |           |
| dNLR <1.76                              | 23 (57.5) | 10 (71.4) | 4 (50.0)  | 4 (57.1) | 10 (66.7) | 51 (60.7) |
| dNLR ≥1.76                              | 17 (42.5) | 4 (28.6)  | 4 (50.0)  | 3 (42.9) | 5 (33.3)  | 33 (39.3) |
| <b>Before 2<sup>nd</sup> cycle dNLR</b> |           |           |           |          |           |           |
| dNLR <1.75                              | 36 (90.0) | 12 (85.7) | 2 (28.6)  | 5 (71.4) | 11 (73.3) | 66 (79.5) |
| dNLR ≥1.75                              | 4 (10.0)  | 2 (14.3)  | 5 (71.4)  | 2 (28.6) | 4 (26.7)  | 17 (20.5) |
| Unknown                                 | 0         | 0         | 1         | 0        | 0         | 1         |
| <b>Variation of dNLR</b>                |           |           |           |          |           |           |
| Both lower than cut off                 | 23 (57.5) | 9 (64.3)  | 2 (28.6)  | 4 (57.1) | 8 (53.4)  | 46 (55.4) |
| From lower to higher                    | 0 (0.0)   | 1 (7.1)   | 2 (28.6)  | 0 (0.0)  | 2 (13.3)  | 5 (6.0)   |
| From higher to lower                    | 13 (32.5) | 3 (21.5)  | 0 (0.0)   | 1 (14.3) | 3 (20.0)  | 20 (24.1) |
| Both higher than cut off                | 4 (10.0)  | 1 (7.1)   | 3 (42.8)  | 2 (28.6) | 2 (13.3)  | 12 (14.5) |
| Unknown                                 | 0         | 0         | 1         | 0        | 0         | 1         |
| <b>Pre PLR</b>                          |           |           |           |          |           |           |
| PLR <152.0                              | 24 (60.0) | 5 (35.7)  | 2 (25.0)  | 3 (42.9) | 5 (33.3)  | 39 (46.4) |
| PLR ≥152.0                              | 16 (40.0) | 9 (64.3)  | 6 (75.0)  | 4 (57.1) | 10 (66.7) | 45 (53.6) |
| <b>Before 2<sup>nd</sup> cycle PLR</b>  |           |           |           |          |           |           |
| PLR <131.0                              | 20 (50.0) | 3 (23.1)  | 0 (0.0)   | 1 (14.3) | 5 (33.3)  | 29 (35.4) |
| PLR ≥131.0                              | 20 (50.0) | 10 (76.9) | 7 (100.0) | 6 (85.7) | 10 (66.7) | 53 (64.6) |
| Unknown                                 | 0         | 1         | 1         | 0        | 0         | 2         |
| <b>Variation of PLR</b>                 |           |           |           |          |           |           |
| Both lower than cut off                 | 16 (40.0) | 2 (15.4)  | 0 (0.0)   | 1 (14.3) | 3 (20.0)  | 22 (26.8) |
| From lower to higher                    | 8 (20.0)  | 3 (23.1)  | 2 (28.6)  | 2 (28.6) | 2 (13.3)  | 17 (20.7) |
| From higher to lower                    | 4 (10.0)  | 1 (7.6)   | 0 (0.0)   | 0 (0.0)  | 2 (13.3)  | 7 (8.5)   |
| Both higher than cut off                | 12 (30.0) | 7 (53.9)  | 5 (71.4)  | 4 (57.1) | 8 (53.4)  | 36 (44.0) |
| Unknown                                 | 0         | 1         | 2         | 0        | 0         | 2         |
| <b>Pre SMI</b>                          |           |           |           |          |           |           |
| Sarcopenia                              | 18 (50.0) | 4 (33.3)  | 6 (75.0)  | 4 (57.1) | 8 (57.1)  | 38 (50.7) |

|                                      |           |           |          |          |           |           |
|--------------------------------------|-----------|-----------|----------|----------|-----------|-----------|
| No sarcopenia                        | 18 (50.0) | 8 (66.7)  | 2 (25.0) | 3 (42.9) | 6 (42.9)  | 37 (49.3) |
| Unknown                              | 4         | 2         | 0        | 0        | 3         | 9         |
| <b>Post SMI</b>                      |           |           |          |          |           |           |
| Sarcopenia                           | 23 (63.9) | 3 (25.0)  | 7 (87.5) | 6 (85.7) | 6 (50.0)  | 45 (60.0) |
| No sarcopenia                        | 13 (36.1) | 12 (75.0) | 1 (12.5) | 1 (14.3) | 6 (50.0)  | 30 (40.0) |
| Unknown                              | 4         | 2         | 0        | 0        | 3         | 9         |
| <b>Pre VATI (cm/m<sup>2</sup>)</b>   |           |           |          |          |           |           |
| <46                                  | 18 (47.4) | 8 (61.5)  | 5 (62.5) | 3 (42.9) | 6 (42.9)  | 40 (50.0) |
| ≥46                                  | 20 (52.6) | 5 (38.5)  | 3 (37.5) | 4 (57.1) | 8 (57.1)  | 40 (50.0) |
| Unknown                              | 2         | 1         | 0        | 0        | 1         | 4         |
| <b>Post VATI (cm/m<sup>2</sup>)</b>  |           |           |          |          |           |           |
| <51                                  | 20 (52.6) | 6 (50.0)  | 5 (62.5) | 3 (42.9) | 5 (38.5)  | 39 (50.0) |
| ≥51                                  | 18 (47.4) | 6 (50.0)  | 3 (37.5) | 4 (57.1) | 8 (61.5)  | 39 (50.0) |
| Unknown                              | 2         | 2         | 0        | 0        | 2         | 6         |
| <b>Pre SATI (cm/m<sup>2</sup>)</b>   |           |           |          |          |           |           |
| <50.8                                | 18 (47.4) | 9 (69.2)  | 4 (50.0) | 5 (71.4) | 4 (28.6)  | 40 (50.0) |
| ≥50.8                                | 20 (52.6) | 4 (30.8)  | 4 (50.0) | 2 (28.6) | 10 (71.4) | 40 (50.0) |
| Unknown                              | 2         | 1         | 0        | 0        | 1         | 4         |
| <b>Post SATI (cm/m<sup>2</sup>)</b>  |           |           |          |          |           |           |
| <46.0                                | 22 (57.9) | 7 (58.3)  | 3 (37.5) | 3 (42.9) | 4 (30.8)  | 39 (50.0) |
| ≥46.0                                | 16 (42.1) | 5 (41.7)  | 5 (62.5) | 4 (57.1) | 9 (69.2)  | 39 (50.0) |
| Unknown                              | 2         | 2         | 0        | 0        | 2         | 6         |
| <b>Pre IMATI (cm/m<sup>2</sup>)</b>  |           |           |          |          |           |           |
| <3.33                                | 23 (60.5) | 7 (53.9)  | 2 (25.0) | 4 (57.1) | 4 (28.6)  | 40 (50.0) |
| ≥3.33                                | 15 (39.5) | 6 (46.1)  | 6 (75.0) | 3 (42.9) | 10 (71.4) | 40 (50.0) |
| Unknown                              | 2         | 1         | 0        | 0        | 1         | 4         |
| <b>Post IMATI (cm/m<sup>2</sup>)</b> |           |           |          |          |           |           |
| <3.40                                | 23 (60.5) | 5 (41.7)  | 1 (12.5) | 5 (71.4) | 5 (38.5)  | 39 (50.0) |
| ≥3.40                                | 15 (39.5) | 7 (58.3)  | 7 (87.5) | 2 (28.6) | 8 (61.5)  | 39 (50.0) |



|                                                                 |            |            |           |           |            |           |
|-----------------------------------------------------------------|------------|------------|-----------|-----------|------------|-----------|
| Unknown                                                         | 2          | 2          | 0         | 0         | 2          | 6         |
| <b>Pre SUB IMATI VISC (cm/m²)</b>                               |            |            |           |           |            |           |
| <114                                                            | 19 (50.0)  | 7 (53.9)   | 5 (62.5)  | 4 (57.1)  | 5 (35.7)   | 40 (50.0) |
| ≥114                                                            | 19 (50.0)  | 6 (46.1)   | 3 (37.5)  | 3 (42.9)  | 9 (64.3)   | 40 (50.0) |
| Unknown                                                         | 2          | 1          | 0         | 0         | 1          | 4         |
| <b>Post SUB IMATI VISC (cm/m²)</b>                              |            |            |           |           |            |           |
| <103                                                            | 21 (55.3)  | 6 (50.0)   | 5 (62.5)  | 3 (42.9)  | 4 (30.8)   | 39 (50.0) |
| ≥103                                                            | 17 (44.7)  | 6 (50.0)   | 3 (37.5)  | 4 (57.1)  | 9 (69.2)   | 39 (50.0) |
| Unknown                                                         | 2          | 2          | 0         | 0         | 2          | 6         |
| <b>Treatment</b>                                                |            |            |           |           |            |           |
| CF/ FOLFOX4/6                                                   | 4 (10.0)   | 3 (21.4)   | 4 (50.0)  | 5 (71.4)  | 5 (33.3)   | 21 (25.0) |
| DOC                                                             | 24 (60.0)  | 9 (64.4)   | 3 (37.5)  | 1 (14.3)  | 7 (46.7)   | 44 (52.4) |
| ECX/ECF/EOX                                                     | 6 (15.0)   | 1 (7.1)    | 0 (0.0)   | 0 (0.0)   | 1 (6.7)    | 8 (9.5)   |
| FLOT                                                            | 6 (15.0)   | 1 (7.1)    | 1 (12.5)  | 1 (14.3)  | 2 (13.3)   | 11 (13.1) |
| <b>WBC count – pre therapy (cells/mm³)</b>                      |            |            |           |           |            |           |
| <4.000                                                          | 1 (2.5)    | 0 (0.0)    | 0 (0.0)   | 0 (0.0)   | 0 (0.0)    | 1 (1.2)   |
| ≥4.000                                                          | 39 (97.5)  | 14 (100.0) | 8 (100.0) | 7 (100.0) | 15 (100.0) | 83 (98.8) |
| <b>WBC count - 2<sup>nd</sup> evaluation (cells/mm³)</b>        |            |            |           |           |            |           |
| <4.000                                                          | 6 (15.0)   | 3 (21.4)   | 2 (28.6)  | 0 (0.0)   | 3 (20.0)   | 14 (16.8) |
| ≥4.000                                                          | 34 (85.0)  | 11 (78.6)  | 5 (71.4)  | 7 (100.0) | 12 (80.0)  | 69 (83.2) |
| Unknown                                                         | 0          | 0          | 1         | 0         | 0          | 1         |
| <b>WBC variation from baseline to 2<sup>nd</sup></b>            |            |            |           |           |            |           |
| <b>Decrease</b>                                                 | 28 (70.0)  | 13 (92.9)  | 5 (71.4)  | 5 (71.4)  | 12 (80.0)  | 63 (75.9) |
| Increase                                                        | 12 (30.0)  | 1 (7.1)    | 2 (28.6)  | 2 (28.6)  | 3 (20.0)   | 20 (24.1) |
| Unknown                                                         | 0          | 0          | 1         | 0         | 0          | 1         |
| <b>Lymphocyte count - pre therapy (cells/mm³)</b>               |            |            |           |           |            |           |
| <1.000                                                          | 0 (0.0)    | 0 (0.0)    | 1 (12.5)  | 0 (0.0)   | 1 (6.7)    | 2 (2.4)   |
| 1.000-4.000                                                     | 40 (100.0) | 14 (100.0) | 7 (87.5)  | 7 (100.0) | 14 (93.3)  | 82 (97.6) |
| <b>Lymphocyte count - 2<sup>nd</sup> evaluation (cells/mm³)</b> |            |            |           |           |            |           |
| <1.000                                                          | 3 (7.5)    | 0 (0.0)    | 1 (14.3)  | 0 (0.0)   | 2 (13.3)   | 6 (7.3)   |

|                                                                      |           |            |           |           |           |           |
|----------------------------------------------------------------------|-----------|------------|-----------|-----------|-----------|-----------|
| 1.000-4.000                                                          | 35 (87.5) | 13 (100.0) | 6 (87.5)  | 7 (100.0) | 13 (86.7) | 74 (90.3) |
| >4.000                                                               | 2 (5.0)   | 0 (0.0)    | 0 (0.0)   | 0 (0.0)   | 0 (0.0)   | 2 (2.4)   |
| Unknown                                                              | 0         | 1          | 1         | 0         | 0         | 2         |
| <b>Lymphocyte variation from baseline to 2<sup>nd</sup></b>          |           |            |           |           |           |           |
| Decrease                                                             | 22 (55.0) | 8 (61.5)   | 6 (85.7)  | 6 (85.7)  | 9 (60.0)  | 51 (62.2) |
| Increase                                                             | 18 (45.0) | 5 (38.5)   | 1 (14.3)  | 1 (14.3)  | 6 (40.0)  | 31 (37.8) |
| Unknown                                                              | 0         | 1          | 1         | 0         | 0         | 2         |
| <b>Mono count - pre therapy (cells/mm<sup>3</sup>)</b>               |           |            |           |           |           |           |
| 200-1.000                                                            | 37 (92.5) | 13 (92.9)  | 8 (100.0) | 6 (85.7)  | 14 (93.3) | 78 (92.9) |
| >1.000                                                               | 3 (7.5)   | 1 (7.1)    | 0 (0.0)   | 1 (14.3)  | 1 (6.7)   | 6 (7.1)   |
| <b>Mono count - 2<sup>nd</sup> evaluation (cells/mm<sup>3</sup>)</b> |           |            |           |           |           |           |
| <200                                                                 | 1 (2.5)   | 0 (0.0)    | 0 (0.0)   | 0 (0.0)   | 0 (0.0)   | 1 (1.2)   |
| 200-1.000                                                            | 28 (70.0) | 13 (92.9)  | 7 (100.0) | 6 (85.7)  | 11 (78.6) | 65 (79.3) |
| >1.000                                                               | 11 (27.5) | 1 (7.1)    | 0 (0.0)   | 1 (14.3)  | 3 (21.4)  | 16 (19.5) |
| Unknown                                                              | 0         | 0          | 1         | 0         | 1         | 2         |
| <b>Monocyte variation from baseline to 2<sup>nd</sup></b>            |           |            |           |           |           |           |
| Decrease                                                             | 6 (15.0)  | 5 (35.7)   | 3 (42.9)  | 3 (42.9)  | 7 (50.0)  | 24 (29.3) |
| Increase                                                             | 34 (85.0) | 9 (64.3)   | 4 (57.1)  | 4 (57.1)  | 7 (50.0)  | 58 (70.7) |
| Unknown                                                              | 0         | 0          | 1         | 0         | 1         | 2         |
| <b>Platelets - pre therapy (cells/mm<sup>3</sup>)</b>                |           |            |           |           |           |           |
| <140.000                                                             | 0 (0.0)   | 0 (0.0)    | 0 (0.0)   | 1 (14.3)  | 0 (0.0)   | 1 (1.2)   |
| 140.000-400.000                                                      | 37 (92.5) | 13 (92.9)  | 8 (100.0) | 6 (85.7)  | 12 (80.0) | 76 (90.5) |
| >400.000                                                             | 3 (7.5)   | 1 (7.1)    | 0 (0.0)   | 0 (0.0)   | 3 (20.0)  | 7 (8.3)   |
| <b>Platelets -2<sup>nd</sup> evaluation (cells/mm<sup>3</sup>)</b>   |           |            |           |           |           |           |
| <140.000                                                             | 1 (2.5)   | 2 (14.3)   | 1 (14.3)  | 0 (0.0)   | 2 (13.3)  | 6 (7.2)   |
| 140.000-400.000                                                      | 37 (92.5) | 11 (78.6)  | 6 (85.7)  | 5 (71.4)  | 12 (80.0) | 71 (85.6) |
| >400.000                                                             | 2 (5.0)   | 1 (7.1)    | 0 (0.0)   | 2 (28.6)  | 1 (6.7)   | 6 (7.2)   |
| Unknown                                                              | 0         | 0          | 1         | 0         | 0         | 1         |
| <b>Platelet variation from baseline to 2<sup>nd</sup></b>            |           |            |           |           |           |           |
| Decrease                                                             | 26 (65.0) | 7 (50.0)   | 6 (85.7)  | 2 (28.6)  | 10 (66.7) | 51 (61.5) |

|                                                               |           |           |           |           |           |           |
|---------------------------------------------------------------|-----------|-----------|-----------|-----------|-----------|-----------|
| Increase                                                      | 14 (35.0) | 7 (50.0)  | 1 (14.3)  | 5 (71.4)  | 5 (33.3)  | 32 (38.5) |
| Unknown                                                       | 0         | 0         | 1         | 0         | 0         | 1         |
| <b>Neutrophils count - pre therapy (cells/mm<sup>3</sup>)</b> |           |           |           |           |           |           |
| <2.000                                                        | 1 (2.5)   | 0 (0.0)   | 0 (0.0)   | 0 (0.0)   | 0 (0.0)   | 1 (1.2)   |
| 2.000-8.000                                                   | 36 (90.0) | 13 (92.9) | 8 (100.0) | 7 (100.0) | 14 (93.3) | 78 (92.9) |
| >8.000                                                        | 3 (7.5)   | 1 (7.1)   | 0 (0.0)   | 0 (0.0)   | 1 (6.7)   | 5 (5.9)   |
| <b>Neutrophils count - 2<sup>nd</sup> evaluation</b>          |           |           |           |           |           |           |
| <2.000                                                        | 9 (22.5)  | 6 (42.9)  | 2 (28.6)  | 2 (28.6)  | 4 (26.7)  | 23 (27.7) |
| 2.000-8.000                                                   | 29 (72.5) | 8 (57.1)  | 5 (71.4)  | 5 (71.4)  | 11 (73.3) | 58 (69.9) |
| >8.000                                                        | 2 (5.0)   | 0 (0.0)   | 0 (0.0)   | 0 (0.0)   | 0 (0.0)   | 2 (2.4)   |
| Unknown                                                       | 0         | 0         | 1         | 0         | 0         | 1         |
| <b>Neutrophil variation from baseline to 2<sup>nd</sup></b>   |           |           |           |           |           |           |
| Decrease                                                      | 31 (77.5) | 13 (92.9) | 4 (57.1)  | 5 (71.4)  | 13 (86.7) | 66 (79.5) |
| Increase                                                      | 9 (22.5)  | 1 (7.1)   | 3 (42.9)  | 2 (28.6)  | 2 (13.3)  | 17 (20.5) |
| Unknown                                                       | 0         | 0         | 1         | 0         | 0         | 1         |
| <b>Anemia - pre therapy</b>                                   |           |           |           |           |           |           |
| Hgb <11 g/dL                                                  | 10 (25.0) | 5 (35.7)  | 4 (50.0)  | 2 (28.6)  | 5 (33.3)  | 26 (30.9) |
| Hgb ≥11 g/dL                                                  | 30 (75.0) | 9 (64.3)  | 4 (50.0)  | 5 (71.4)  | 10 (66.7) | 58 (69.1) |
| <b>Anemia – 2<sup>nd</sup> evaluation</b>                     |           |           |           |           |           |           |
| Hgb <11 g/dL                                                  | 13 (32.5) | 6 (42.9)  | 3 (42.9)  | 3 (42.9)  | 5 (33.3)  | 30 (36.1) |
| Hgb ≥11 g/dL                                                  | 27 (67.5) | 8 (57.1)  | 4 (57.1)  | 4 (57.1)  | 10 (66.7) | 53 (63.9) |
| Unknown                                                       | 0         | 0         | 1         | 0         | 0         | 1         |
| <b>Hemoglobin variation from baseline to 2<sup>nd</sup></b>   |           |           |           |           |           |           |
| Decrease                                                      | 33 (82.5) | 12 (85.7) | 4 (57.1)  | 6 (85.7)  | 12 (80.0) | 67 (80.7) |
| Increase                                                      | 7 (17.5)  | 2 (14.3)  | 3 (42.9)  | 1 (14.3)  | 3 (20.0)  | 16 (19.3) |
| Unknown                                                       | 0         | 0         | 1         | 0         | 0         | 1         |
| <b>TBIL - pre therapy</b>                                     |           |           |           |           |           |           |
| <0.32                                                         | 19 (47.5) | 6 (42.9)  | 3 (37.5)  | 3 (42.9)  | 6 (40.0)  | 37 (44.1) |
| ≥0.32                                                         | 21 (52.5) | 8 (57.1)  | 5 (62.5)  | 4 (57.1)  | 9 (60.0)  | 47 (55.9) |
| <b>TBIL - 2<sup>nd</sup> evaluation</b>                       |           |           |           |           |           |           |

|                                                                     |           |          |          |          |           |           |
|---------------------------------------------------------------------|-----------|----------|----------|----------|-----------|-----------|
| <0.32                                                               | 18 (46.2) | 6 (46.2) | 3 (42.9) | 4 (57.1) | 6 (40.0)  | 37 (45.7) |
| ≥0.32                                                               | 21 (53.8) | 7 (53.8) | 4 (57.1) | 3 (42.9) | 9 (60.0)  | 44 (54.3) |
| Unknown                                                             | 1         | 1        | 1        | 0        | 0         | 3         |
| <b>TBIL variation from baseline to 2<sup>nd</sup></b>               |           |          |          |          |           |           |
| From <0.32 to <0.32                                                 | 14 (35.9) | 4 (30.8) | 2 (28.6) | 2 (28.6) | 4 (26.7)  | 26 (32.1) |
| From <0.32 to ≥0.32                                                 | 5 (12.8)  | 1 (7.7)  | 0 (0.0)  | 1 (14.2) | 2 (13.3)  | 9 (11.1)  |
| From ≥ 0.32 to <0.32                                                | 4 (10.3)  | 2 (15.3) | 1 (14.3) | 2 (28.6) | 2 (13.3)  | 11 (13.6) |
| From ≥0.32 to ≥0.32                                                 | 16 (41.0) | 6 (46.2) | 4 (57.1) | 2 (28.6) | 7 (46.7)  | 35 (43.2) |
| Unknown                                                             | 1         | 1        | 1        | 0        | 0         | 3         |
| <b>eGFR - pre therapy (ml/min/1.73 m<sup>2</sup>)</b>               |           |          |          |          |           |           |
| Higher than 90                                                      | 17 (44.7) | 5 (35.7) | 2 (25.0) | 1 (14.3) | 4 (26.7)  | 29 (35.4) |
| From 60 to 89                                                       | 18 (47.4) | 8 (57.1) | 6 (75.0) | 6 (85.7) | 8 (53.3)  | 46 (56.1) |
| From 30 to 59                                                       | 3 (7.9)   | 1 (7.1)  | 0 (0.0)  | 0 (0.0)  | 3 (20.0)  | 7 (8.5)   |
| Unknown                                                             | 2         | 0        | 0        | 0        | 0         | 2         |
| <b>eGFR - 2<sup>nd</sup> evaluation (ml/min/1.73 m<sup>2</sup>)</b> |           |          |          |          |           |           |
| Higher than 90                                                      | 22 (56.4) | 6 (46.1) | 3 (42.9) | 4 (57.1) | 5 (35.7)  | 40 (50.0) |
| From 60 to 89                                                       | 15 (38.5) | 7 (53.9) | 4 (57.1) | 2 (28.6) | 6 (42.9)  | 34 (42.5) |
| From 30 to 59                                                       | 2 (5.1)   | 0 (0.0)  | 0 (0.0)  | 1 (14.3) | 3 (21.4)  | 6 (7.5)   |
| Unknown                                                             | 1         | 1        | 1        | 0        | 1         | 4         |
| <b>Egfr variation from baseline to 2<sup>nd</sup></b>               |           |          |          |          |           |           |
| Decrease                                                            | 17 (44.7) | 4 (30.8) | 1 (14.3) | 4 (57.1) | 3 (21.4)  | 29 (36.7) |
| Increase                                                            | 21 (55.3) | 9 (69.2) | 6 (85.7) | 3 (42.9) | 11 (78.6) | 50 (63.3) |
| Unknown                                                             | 2         | 1        | 1        | 0        | 1         | 5         |
| <b>BMI</b>                                                          |           |          |          |          |           |           |
| BMI <20.0                                                           | 3 (7.5)   | 1 (7.1)  | 1 (12.5) | 0 (0.0)  | 1 (6.7)   | 6 (7.0)   |
| BMI 20.0-24.9                                                       | 15 (37.5) | 7 (50.0) | 2 (25.0) | 3 (42.9) | 3 (20.0)  | 30 (35.7) |
| BMI 25.0-29.9                                                       | 19 (47.5) | 5 (35.8) | 4 (50.0) | 4 (57.1) | 7 (46.7)  | 39 (46.4) |
| BMI ≥30                                                             | 3 (7.5)   | 1 (7.1)  | 1 (12.5) | 0 (0.0)  | 4 (26.6)  | 9 (10.7)  |
